# Supplementary material for: Facile rhodamine-based colorimetric sensors for sequential detections of Cu(ii) ions and pyrophosphate (P2O74−) anions
Source: Royal Society of Chemistry journal article supplement (doi:10.1039/c6ra24472f), 2016-01-01
Supplement: c6ra24472f1.pdf [file c6ra24472f1.pdf]

## Supporting Information

### Facile rhodamine-based colorimetric sensors for sequential detections of Cu (II) ion and pyrophosphate (P<sub>2</sub>O<sub>7</sub><sup>4-</sup>) anion

Reguram Arumugaperumal,<sup>a</sup> Venkatesan Srinivasadesikan,<sup>b</sup> Ming-Chang Lin,<sup>b</sup> Muthaiah Shellaiah,<sup>a</sup> Tarun Shukla<sup>a</sup> and Hong-Cheu Lin<sup>a\*</sup>

<sup>a</sup>Department of Materials Science and Engineering, National Chiao Tung University, Hsinchu 300, Taiwan.

<sup>b</sup>Center for Interdisciplinary Molecular Science, Department of Applied Chemistry, National Chiao Tung University, Hsinchu 300, Taiwan.

linhc@mail.nctu.edu.tw

#### Contents

1. Syntheses of **Rh1** and **Rh2** .....(S2-S3)
2. <sup>1</sup>H NMR and <sup>13</sup>C NMR of **compounds 1-3** .....(S4-S9)
3. <sup>1</sup>H NMR, <sup>13</sup>C NMR and mass spectra of **Rh1** and **Rh2** .....(S10-S15)
4. Supporting figures.....(S16-26)

### Synthesis of compound (1)

A 1.0 M solution of  $\text{BBr}_3$  in 20 mL (20 mmol) of  $\text{CH}_2\text{Cl}_2$  was added drop wise through a septum with use of a syringe to a stirred solution of 1gm (5.2 mmol) 1,2- dimethoxy-3,6-diformylbenzene in 10mL of dry  $\text{CH}_2\text{Cl}_2$  at  $-78\text{ }^\circ\text{C}$ . The reaction mixture was stirred under inert atmosphere for an additional 30 min at room temperature. The reaction mixture was subsequently poured into 100 mL of ice water, stirred for 30min, and then saturated with NaCl salt. The product was isolated by extraction into 100 mL of  $\text{CH}_2\text{Cl}_2$  three times, washed with  $\text{H}_2\text{O}$ , dried in  $\text{Na}_2\text{SO}_4$ , and evaporated to afford 2,3-dihydroxyterephthalaldehyde (**1**) as a grassy yellow solid (780 mg, 90%).  $^1\text{H-NMR}$  ( $\text{DMSO-D}_6$ )  $\delta$ : 10.74 (2H, b, OH), 10.30 (2H, s, CHO), 7.26 (2H, s, aromatic CH);  $^{13}\text{C-NMR}$  ( $\text{DMSO-D}_6$ )  $\delta$ : 193.0, 151.2, 126.1, 119.1.

### Synthesis of compound (2)

To a solution of salicylaldehyde (1.5 g, 2.25 mmol) and bis(2-chloroethyl) ether (0.85 g, 6 mmol) in DMSO (20 mL), were added NaOH (360 mg, 9 mmol). The suspension was heated at  $120\text{ }^\circ\text{C}$  for 24 h. After cooling the reaction mixture was subsequently poured into 100 mL of water and extracted with  $\text{CH}_2\text{Cl}_2$  followed by a saturated aqueous solution of sodium chloride was added. The water layer was combined and reextracted with  $\text{CH}_2\text{Cl}_2$ . The combined organic layers were dried over anhydrous  $\text{MgSO}_4$ , concentrated *in vacuo* and the crude product was purified by column chromatography EA:hexane (1:9, v/v) The product was obtained as a pale yellow solid; yield 1.13 g, 59%;  $^1\text{H NMR}$  ( $\text{CDCl}_3$ )  $\delta$ : 10.48 (s, 2H), 7.78 (dd, 2H,  $J = 6.9\text{ Hz}$  and  $1.8\text{ Hz}$ ), 7.54 - 7.48 (m, 2H), 7.04 - 6.96 (m, 4 H), 4.25 (t, 4H,  $J = 6\text{ Hz}$ ), 3.97 (t, 4H,  $J = 6\text{ Hz}$ ) ppm.  $^{13}\text{C NMR}$  ( $\text{CDCl}_3$ )  $\delta$ : 189.6, 161.0, 135.9, 128.4, 125.0, 121.1, 112.8, 69.90, 68.3.

### Synthesis of compound (3)

To a 100 mL flask, rhodamine B (2.4 g, 5 mmol) was dissolved in 50 mL ethanol. 6.0 mL (excess) hydrazine hydrate (85%) was then added drop wise with vigorous stirring at room temperature. After the addition, the stirred mixture was heated to reflux in an air bath for 2 h. The solution changed from dark purple to light orange and became clear. Then reaction mixture was cooled and solvent was removed under reduced pressure. 1 M HCl (about 100 mL) was added to the solid in the flask to generate a clear red solution. After that, 1 M NaOH (about 150 mL) was added slowly with stirring until the pH of the solution reached 9~10. The resulting precipitate was filtered and washed 3 times with 25 mL water. The product was dried in hot air oven for 24 h obtained as a 1.6 g 4 (75%) as

pink solid.  $^1\text{H}$  NMR ( $\text{CDCl}_3$ )  $\delta$ : 7.94 (dd, 1H,  $J = 2.4$  Hz and 6.3 Hz), 7.46 – 7.43 (m, 2H), 7.11 (dd, 2H,  $J = 3.9$  Hz and 4.5 Hz), 6.45 (d, 2H,  $J = 8.7$  Hz), 6.41 (d, 2H,  $J = 2.1$  Hz), 6.30 (dd, 2H,  $J = 2.4$  Hz and 9 Hz), 3.53 (bs, 2H), 3.36 (q, 8H,  $J = 6.9$  Hz), 1.16 (t, 12H,  $J = 6.9$  Hz);  $^{13}\text{C}$  NMR ( $\text{CDCl}_3$ )  $\delta$ : 166.1, 153.8, 151.5, 148.8, 132.5, 130.0, 128.1, 128.0, 123.8, 122.9, 108.0, 104.6, 98.0, 65.94, 44.4, 12.6.

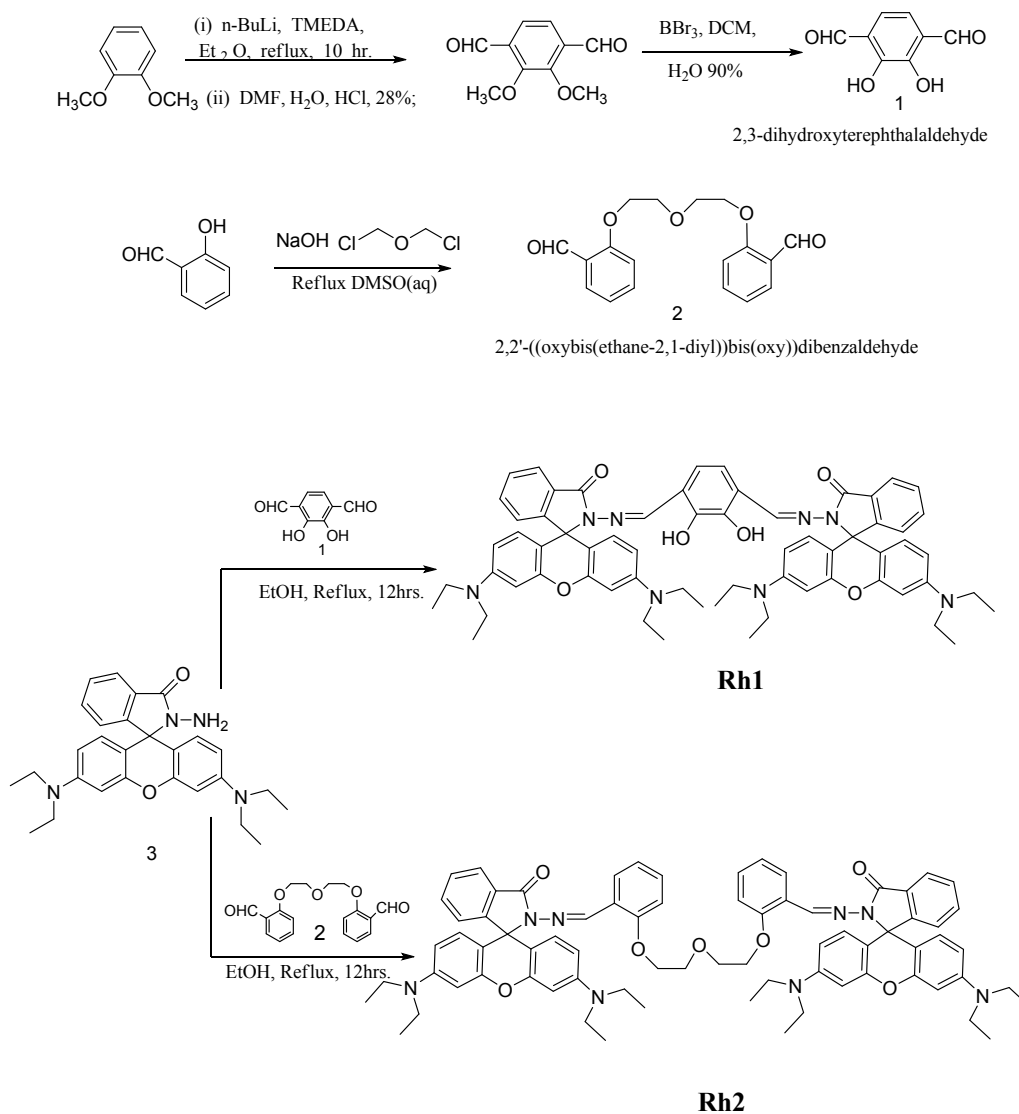

**Scheme S1** Synthetic procedures of **Rh1** and **Rh2**.

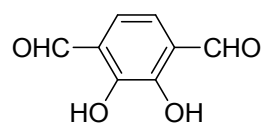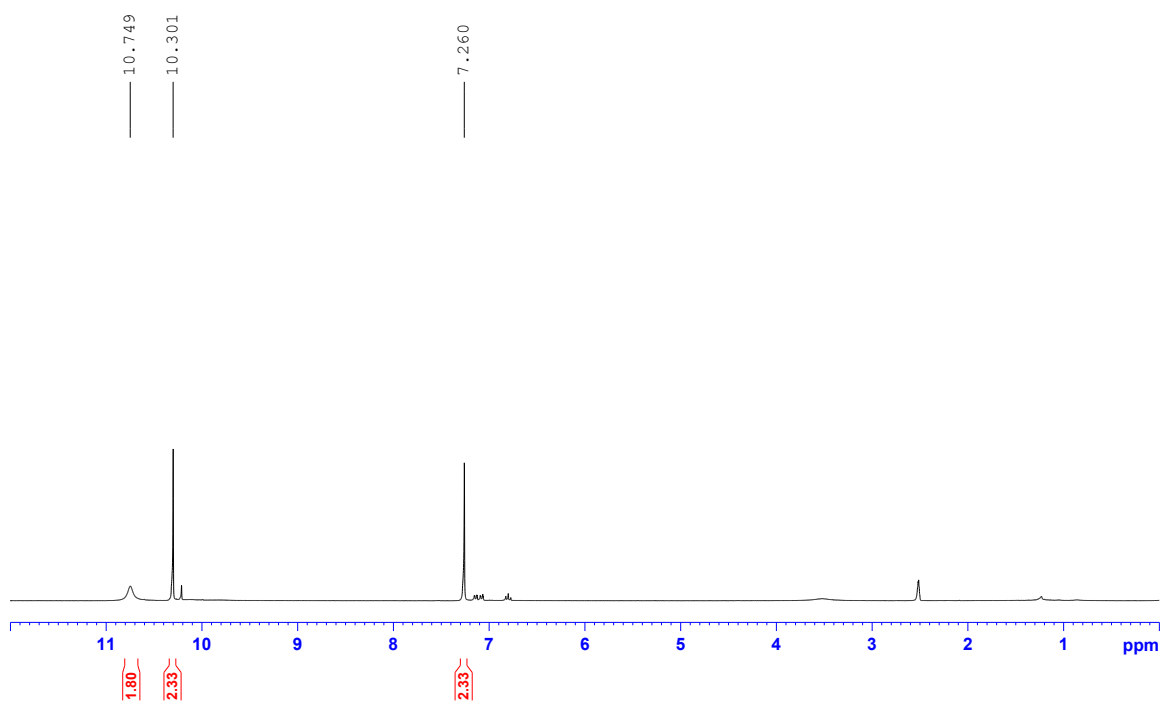

**Fig. S1**  $^{1}\text{H}$  NMR spectrum of compound 1 in DMSO.

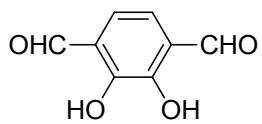

DR intermediate

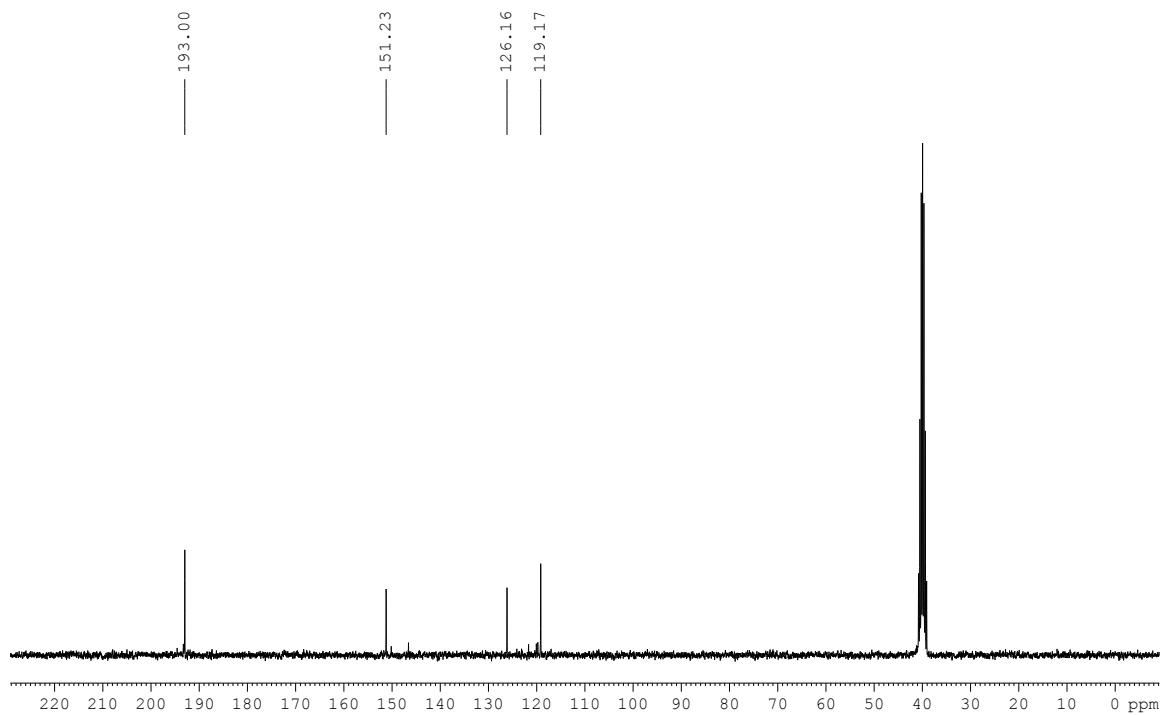

**Fig. S2** <sup>13</sup>C NMR spectrum of compound **1** in DMSO.

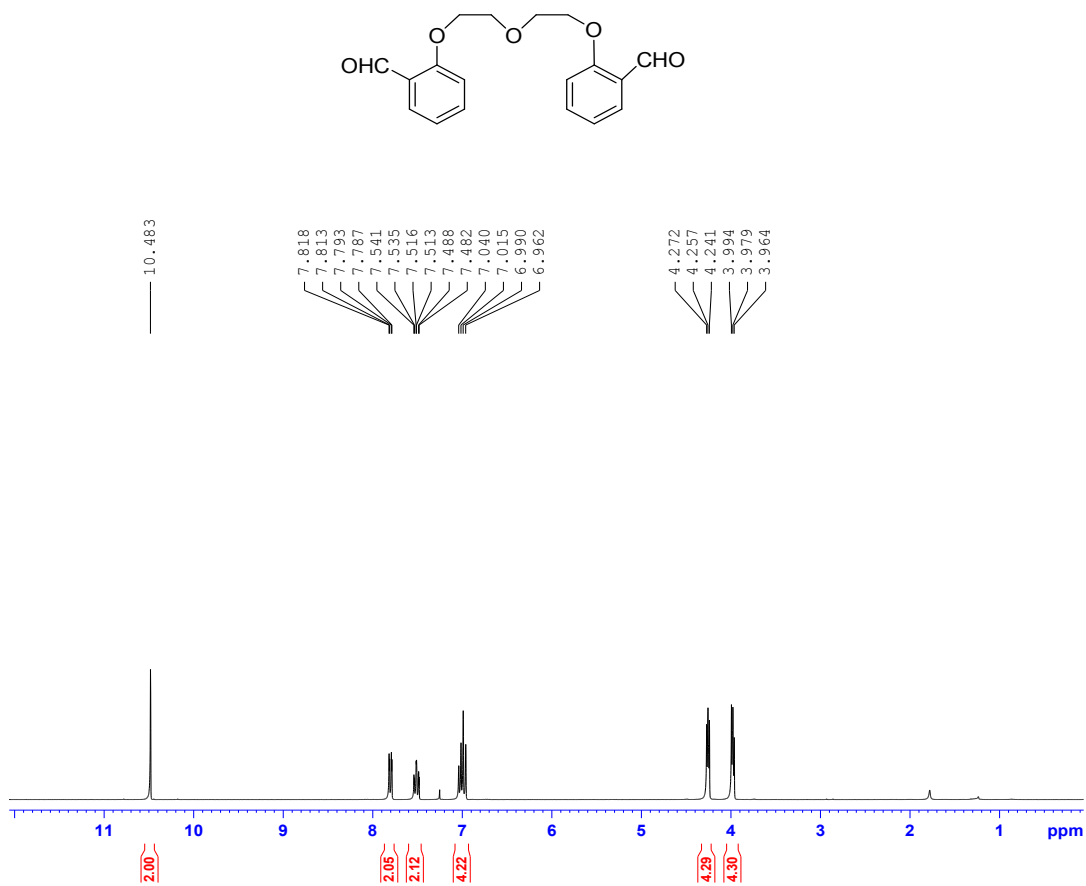

**Fig. S3** <sup>1</sup>H NMR spectrum of compound **2** in CDCl<sub>3</sub>.

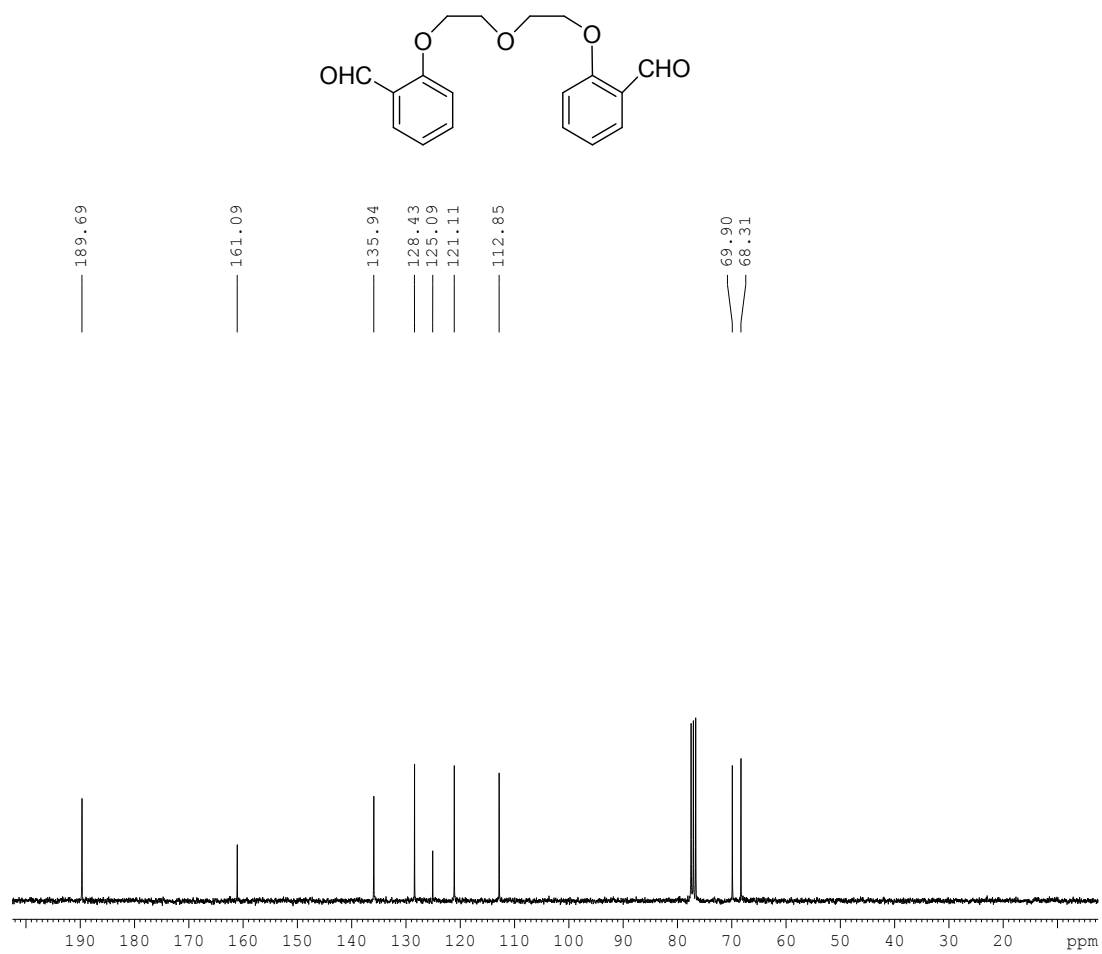

**Fig. S4**  $^{13}\text{C}$  NMR spectrum of compound **2** in  $\text{CDCl}_3$ .

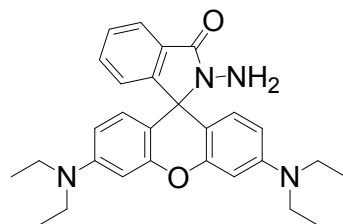

nh2

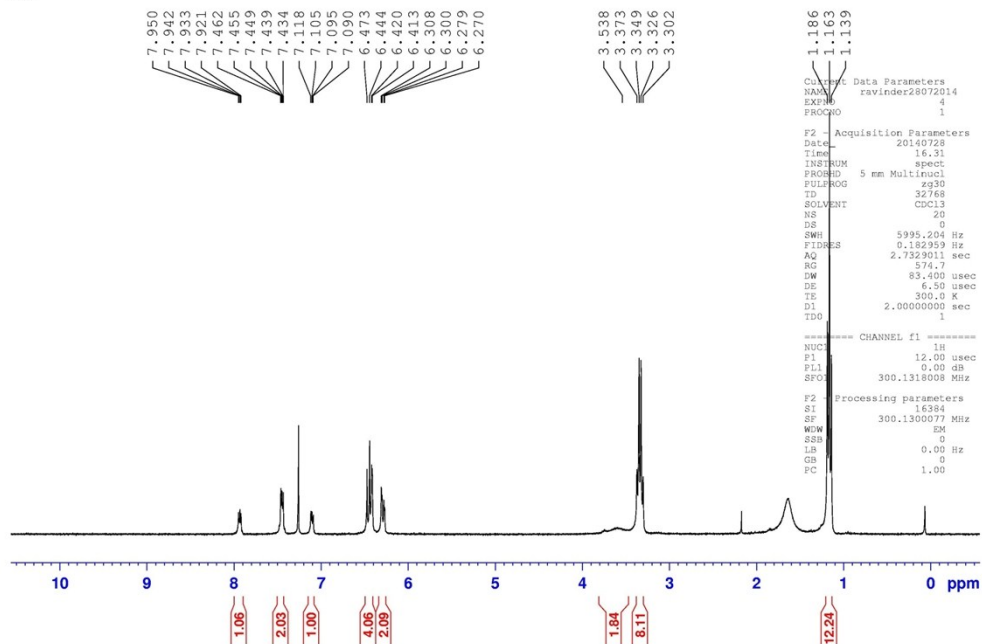

Fig. S5  $^1\text{H}$  NMR spectrum of compound **3** in  $\text{CDCl}_3$ .



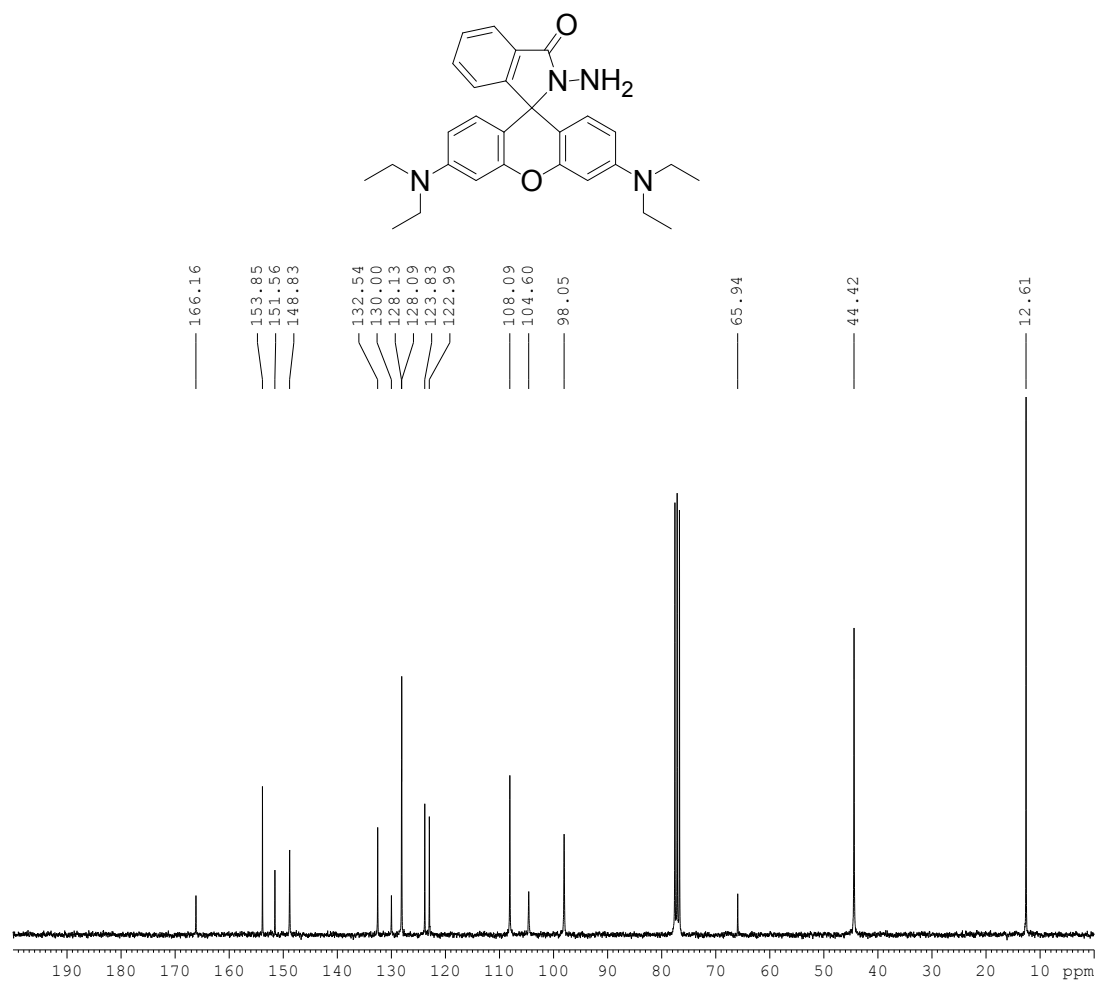

**Fig. S6**  $^{13}\text{C}$  NMR spectrum of compound 3 in  $\text{CDCl}_3$ .

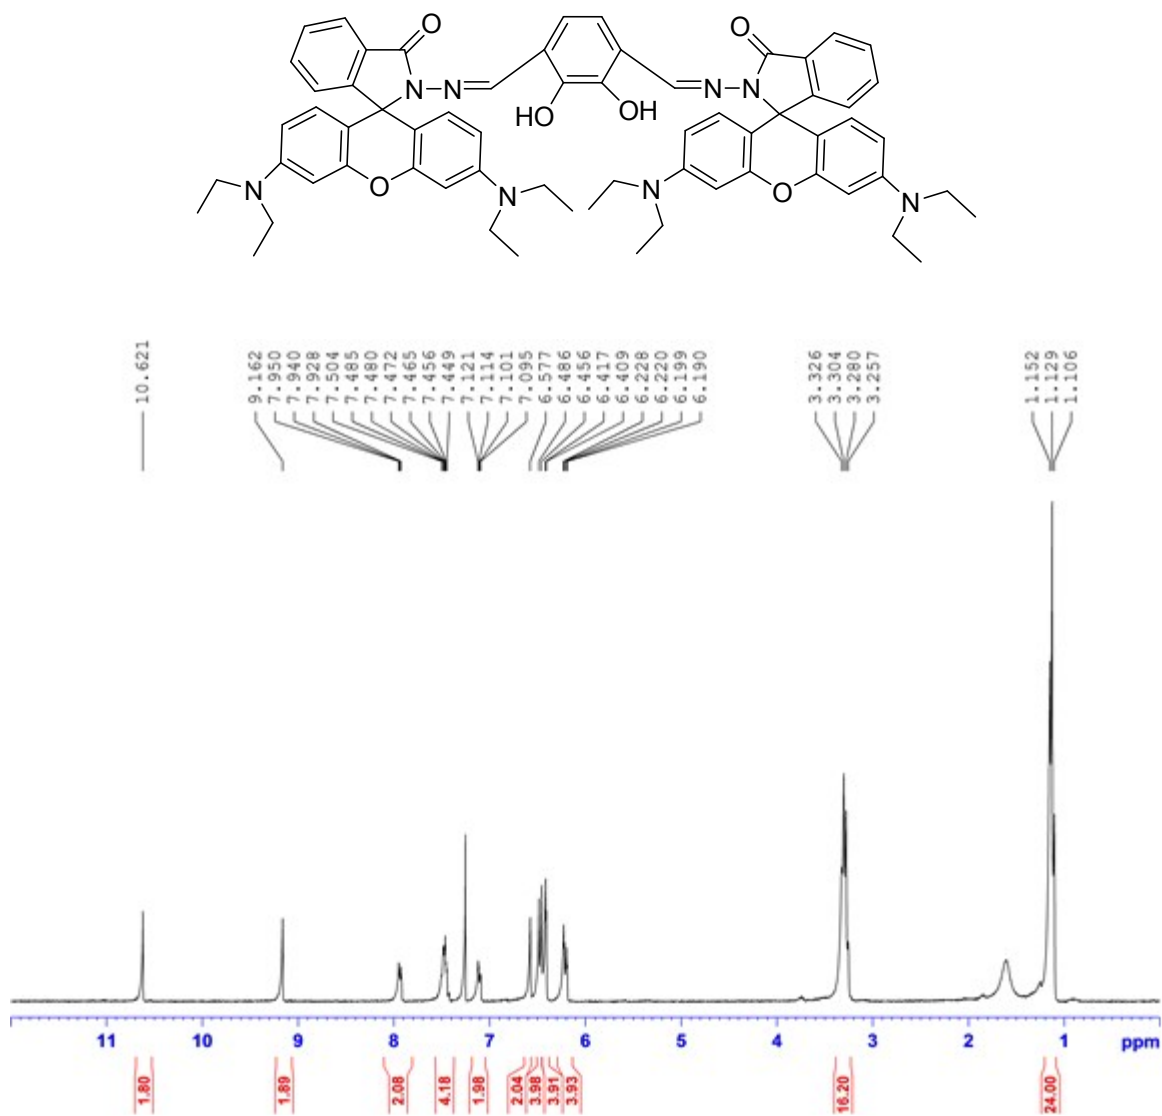

**Fig. S7**  $^1\text{H}$  NMR spectrum of probe **Rh1** in  $\text{CDCl}_3$ .

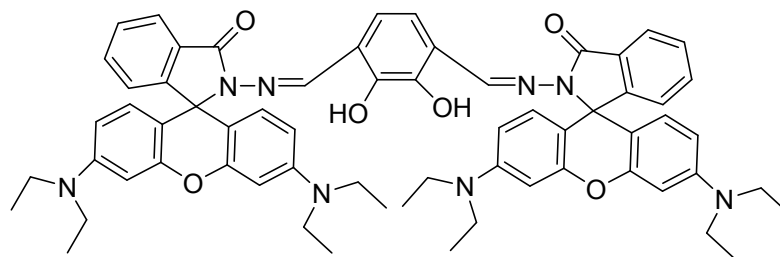

DR

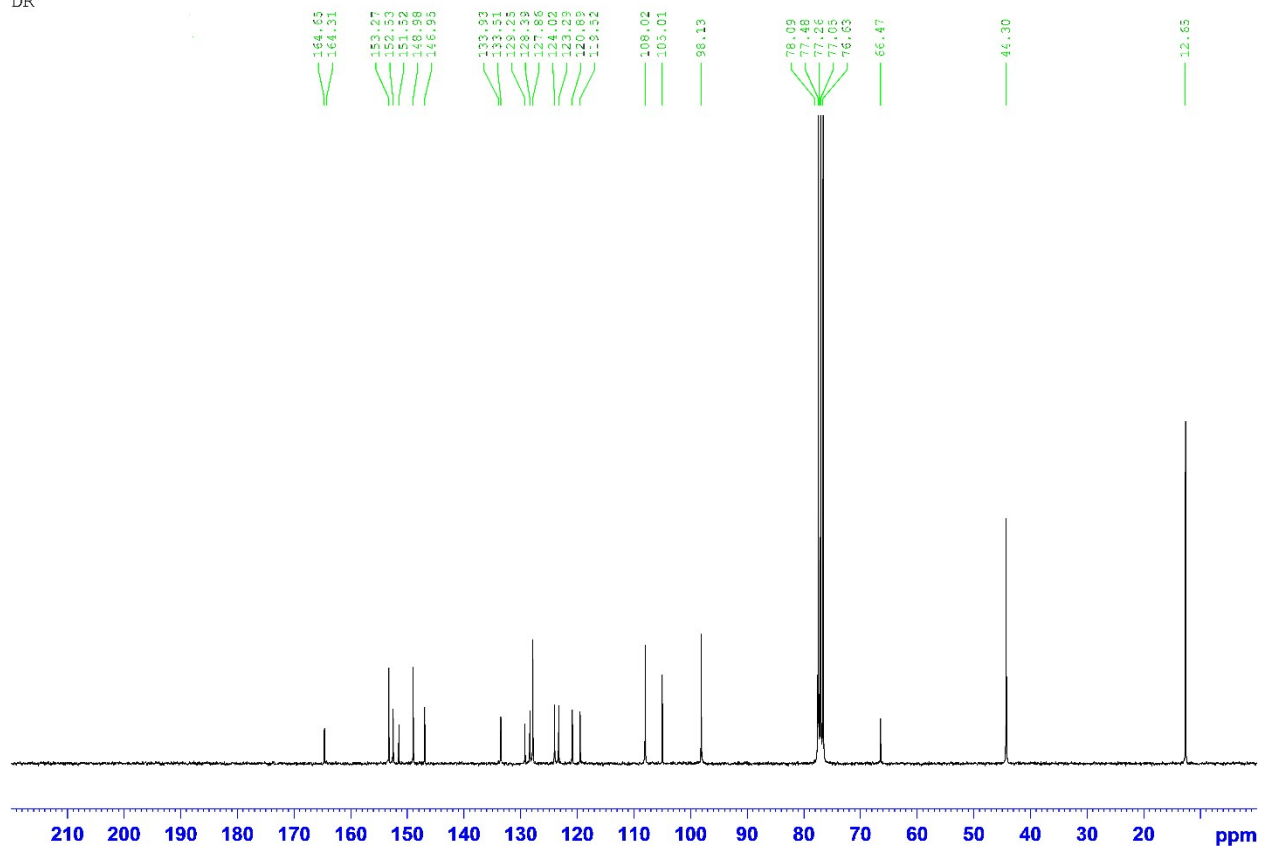

**Fig. S8**  $^{13}\text{C}$  NMR spectrum of probe **Rh1** in  $\text{CDCl}_3$ .

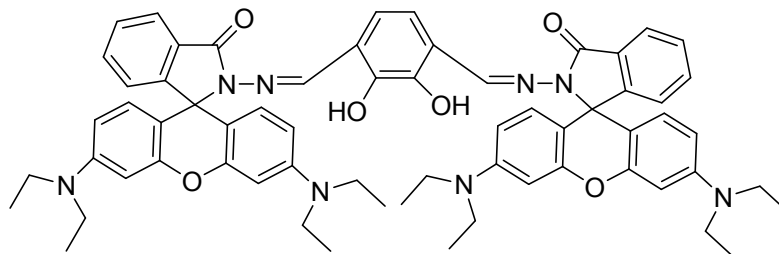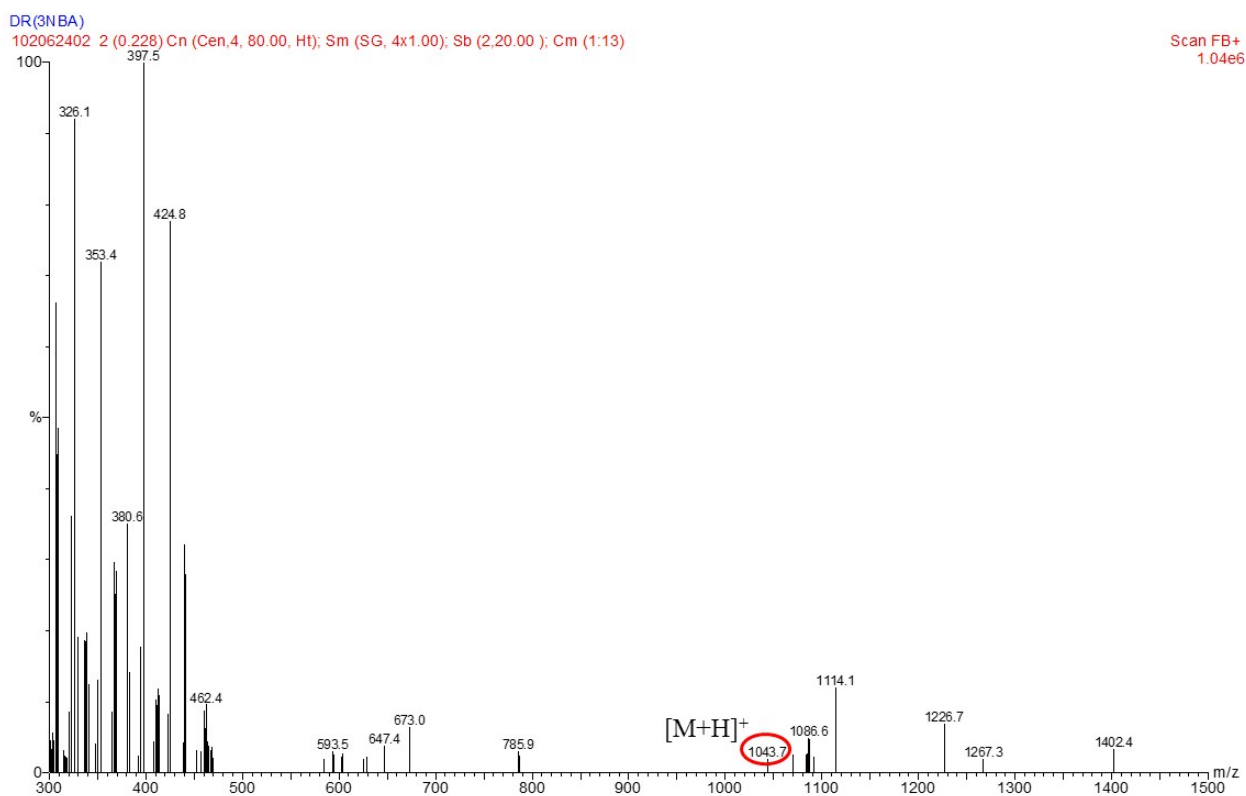

**Fig. S9** Mass (FAB) spectrum of probe **Rh1**.

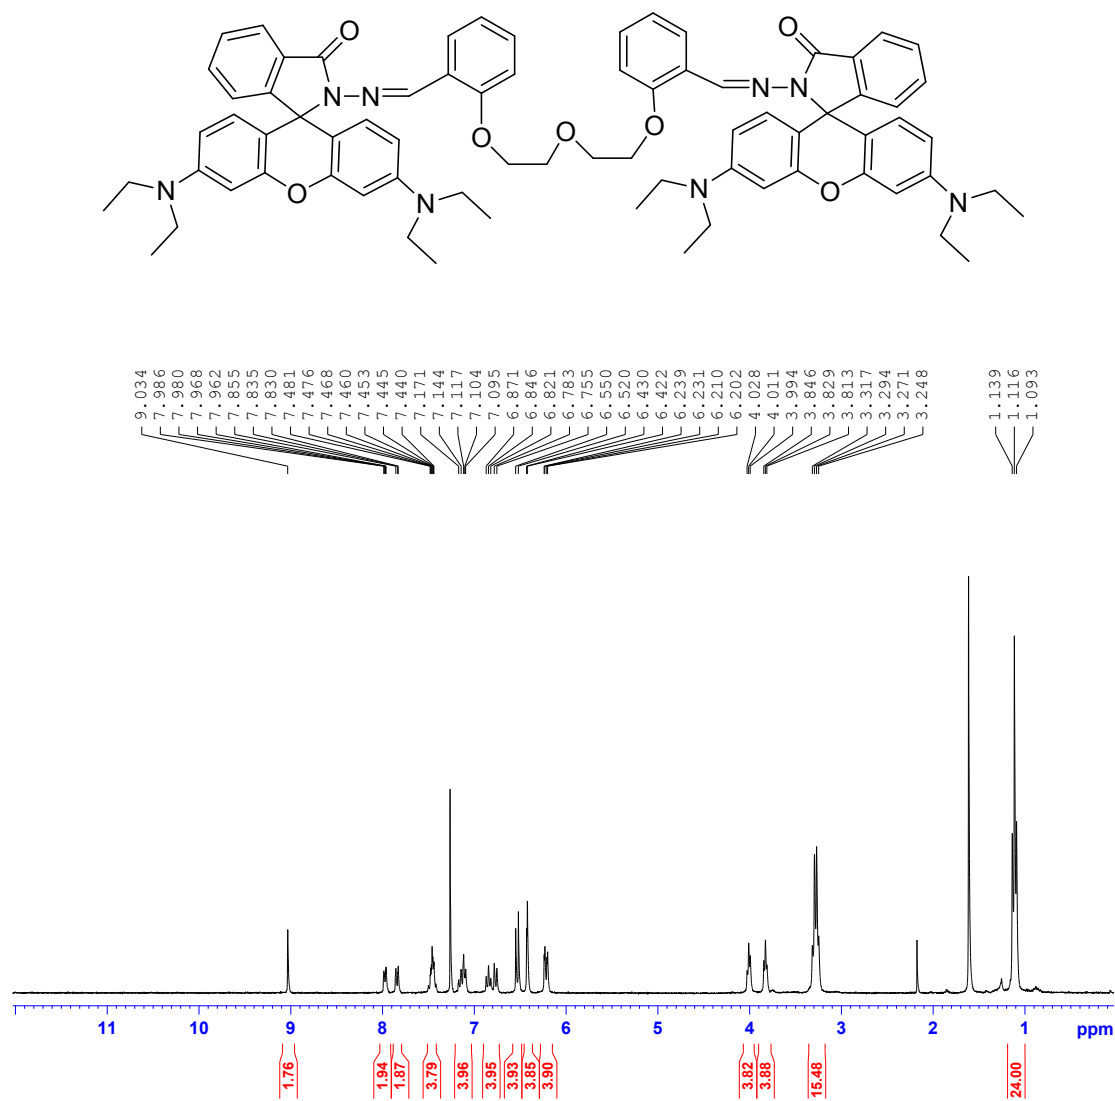

**Fig. S10**  $^1\text{H}$  NMR spectrum of probe **Rh2** in  $\text{DMSO-}d_6$ .

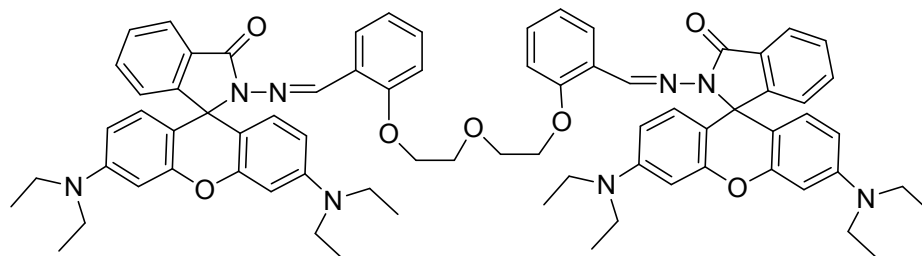

MR

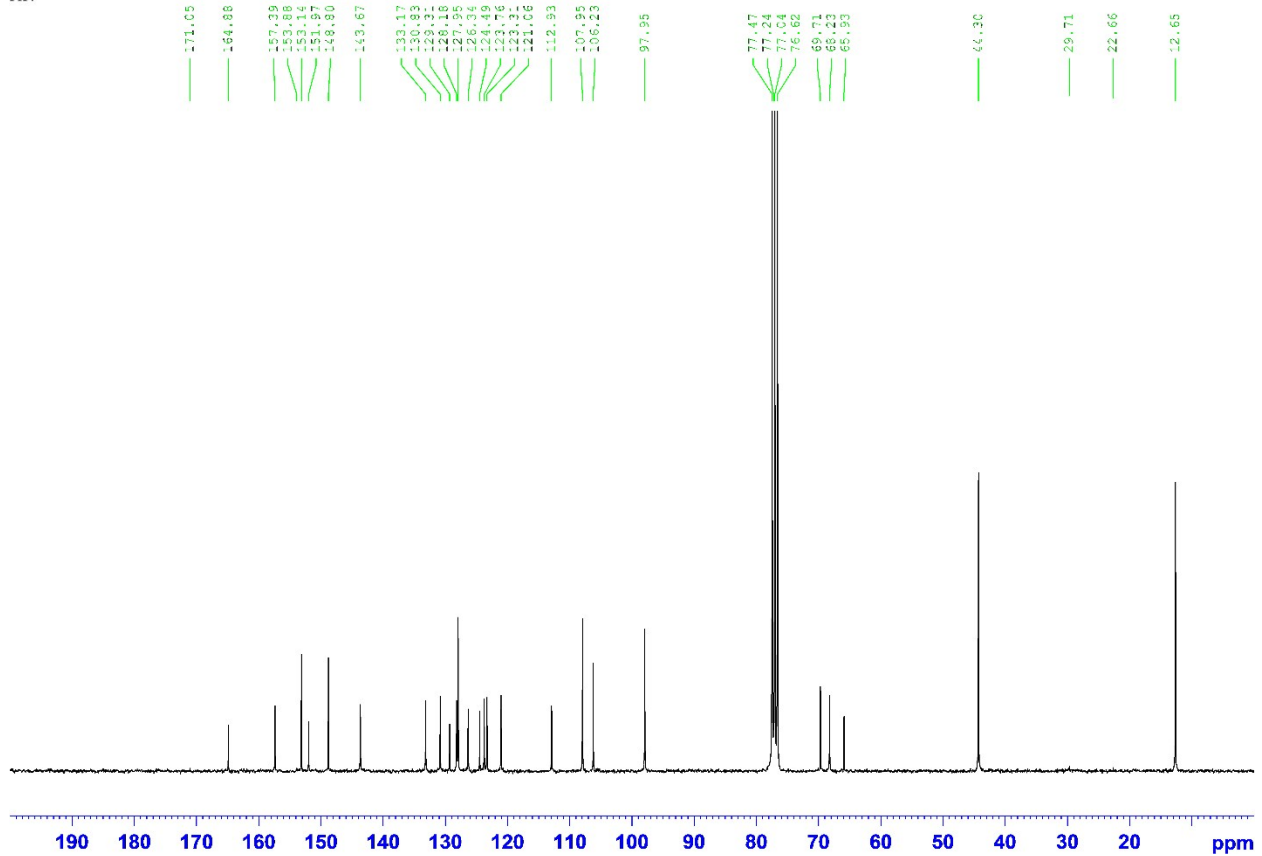

Fig. S11 <sup>13</sup>C NMR spectrum of probe Rh2 in CDCl<sub>3</sub>.

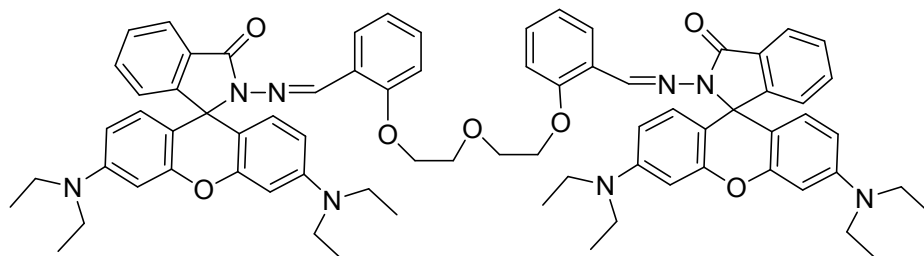

MR(3NBA)

102062404 3 (0.330) Cn (Cen 4, 80.00, Ht); Sm (SG, 4x1.00); Sb (2,20.00); Cm (1:11)

Scan FB+  
1.65e6

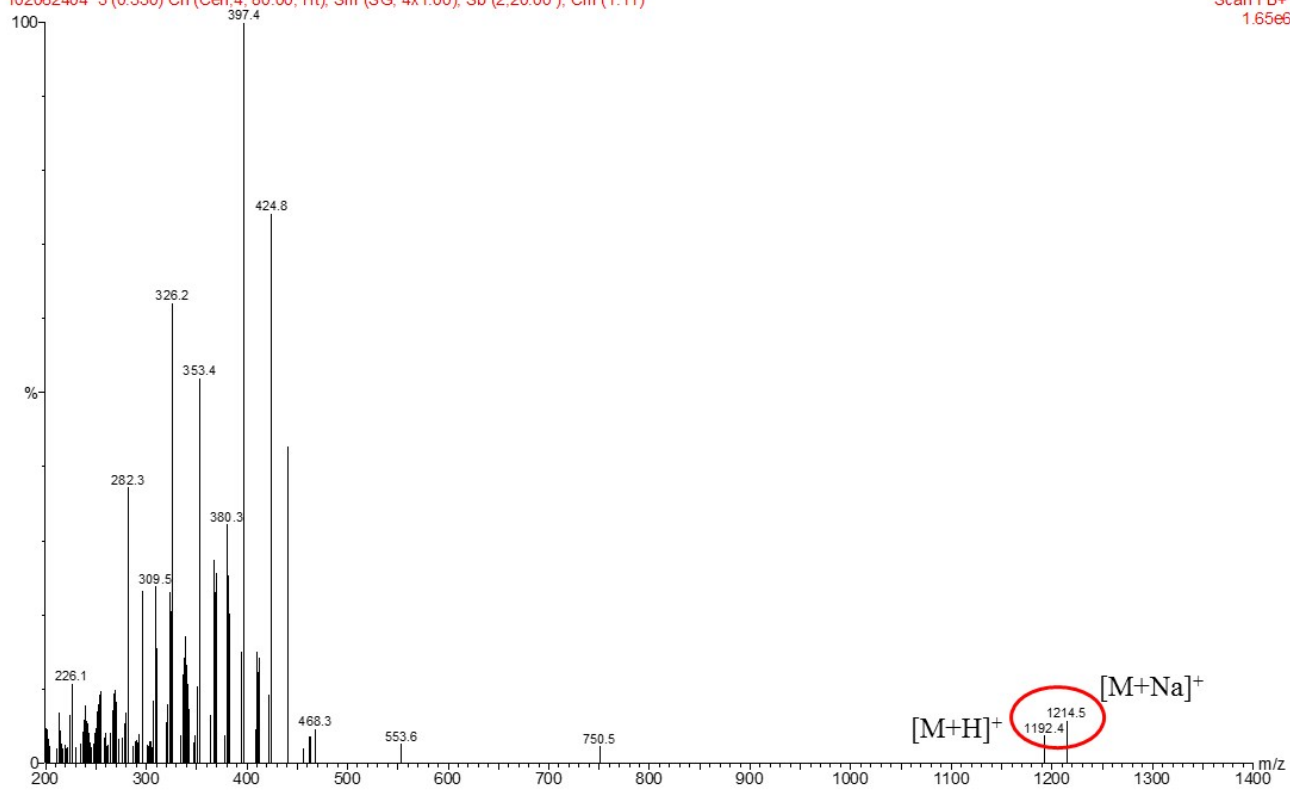

Fig. S12 Mass (FAB) spectrum of probe Rh2.

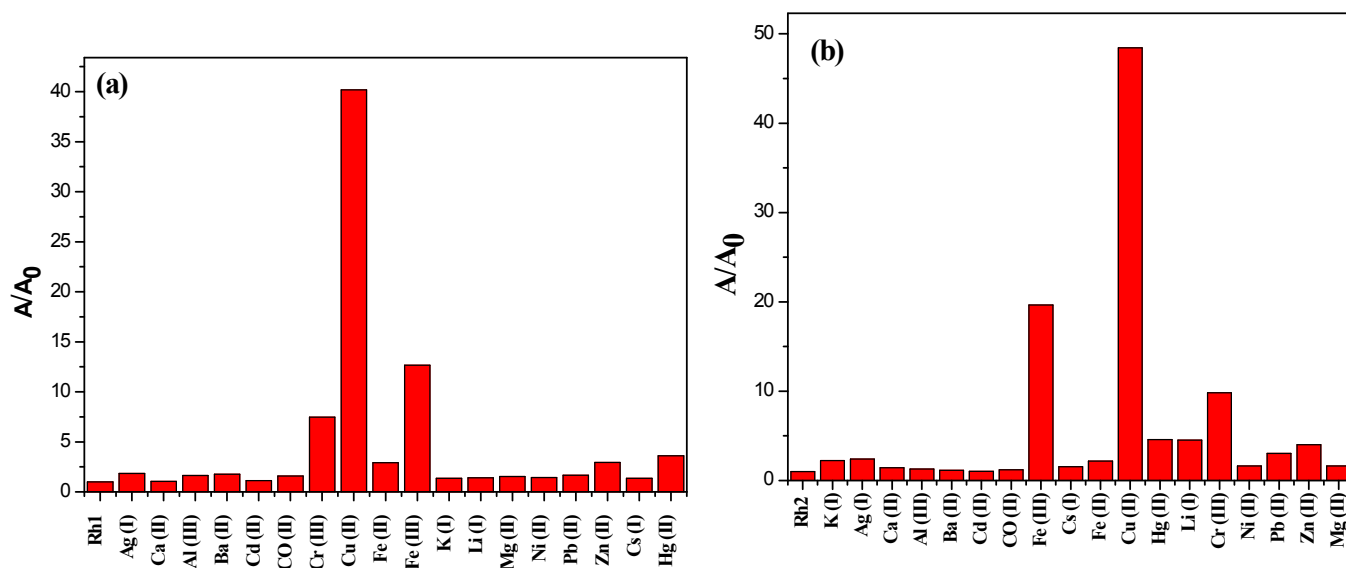

**Fig. S13** UV Absorption responses of sensor probes (a) **Rh1** and (b) **Rh2** (10  $\mu\text{M}$ ) in  $\text{CH}_3\text{CN-H}_2\text{O}$  (v/v = 9 : 1, 5mM Tris-HCl, pH 7.4) in the absence and presence of various metal ions (2.4 and 5 eqivs., respectively) absorbance at 554 nm.

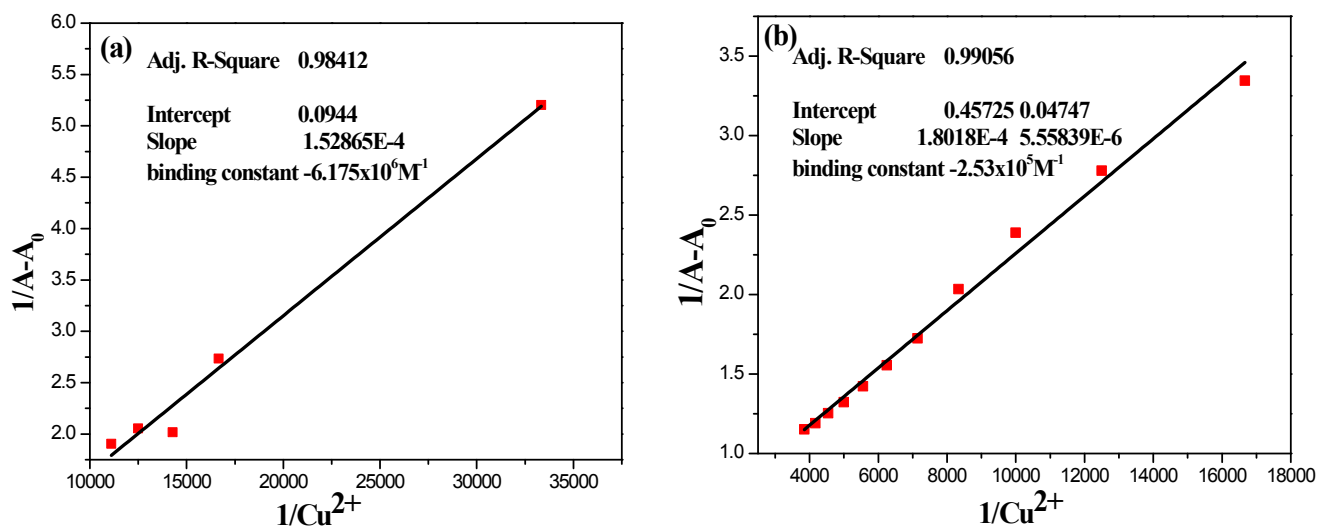

**Fig. S14** Binding constants of (a) **Rh1** and (b) **Rh2** for the titration of  $\text{Cu}^{2+}$  against the ratio of colorimetric response for chemosensor (10  $\mu\text{M}$ ) in  $\text{CH}_3\text{CN-H}_2\text{O}$  (v/v = 9 : 1, 5mM Tris-HCl, pH 7.4).



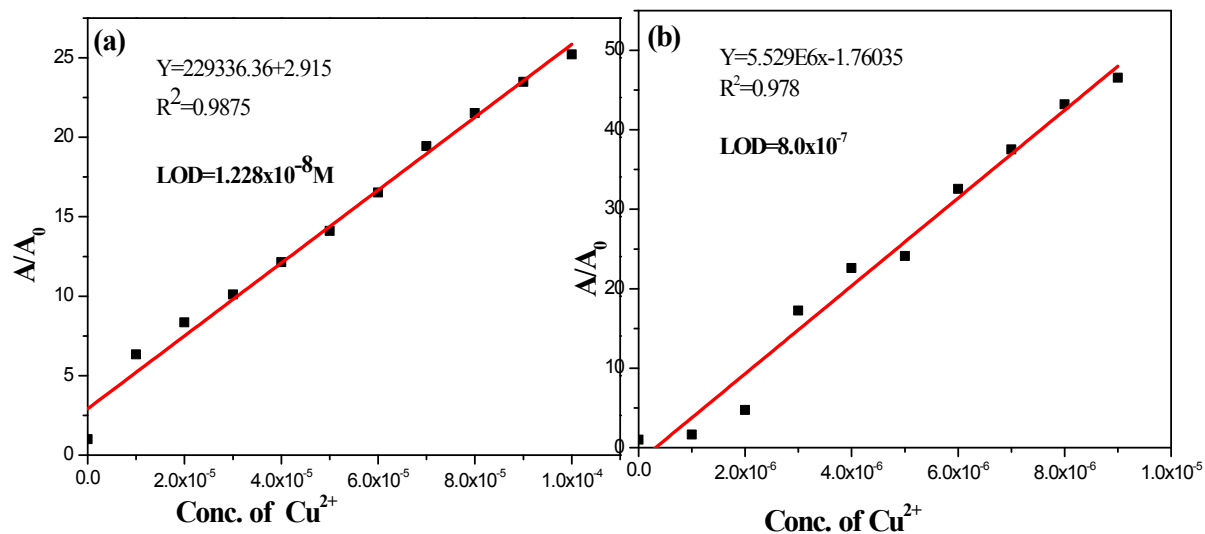

**Fig. S15** Standard deviations and linear fit equations for detection limit calculations of (a) **Rh1** and (b) **Rh2**. [Note: Detection limit calculations were based on the absorbance changes versus  $Cu^{2+}$  metal ion concentrations.]

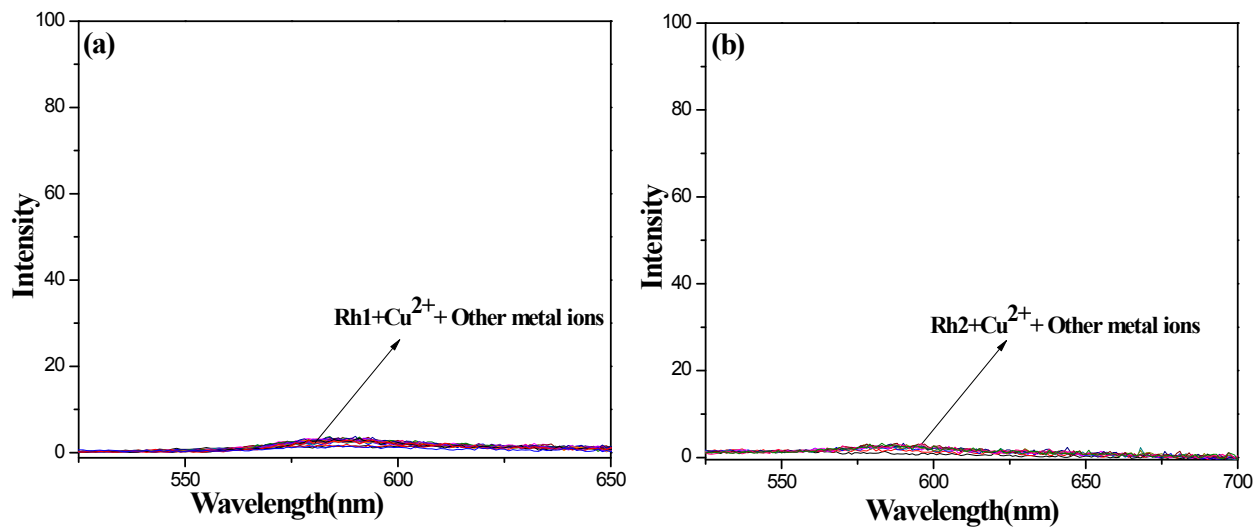

**Fig. S16** Fluorescence spectra of (a) **Rh1** and (b) **Rh2** ( $10 \mu M$ ) in  $CH_3CN-H_2O$  ( $v/v = 9 : 1$ ,  $5mM$  Tris-HCl,  $pH 7.4$ ) upon the addition of 5 equiv. metal ions. (Ex.  $550 nm$ )

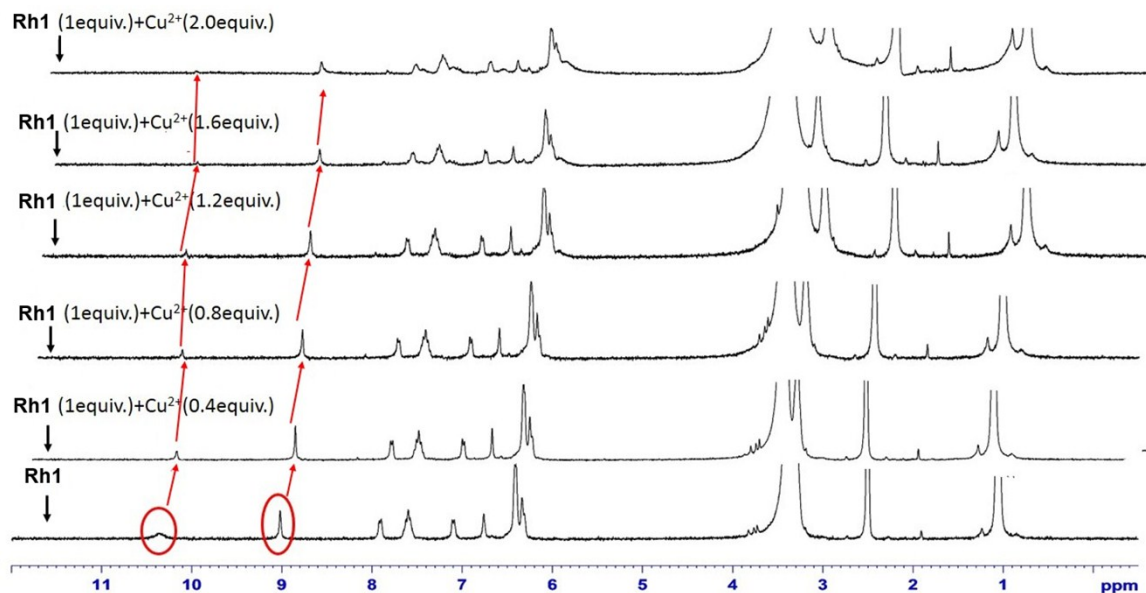

**Fig. S17**  $^1\text{H}$ NMR spectral changes of **Rh1** (10 mM) in  $\text{DMSO-}d_6$  titrated with (0–2) equiv. of  $\text{Cu}^{2+}$  in  $\text{D}_2\text{O}$ .

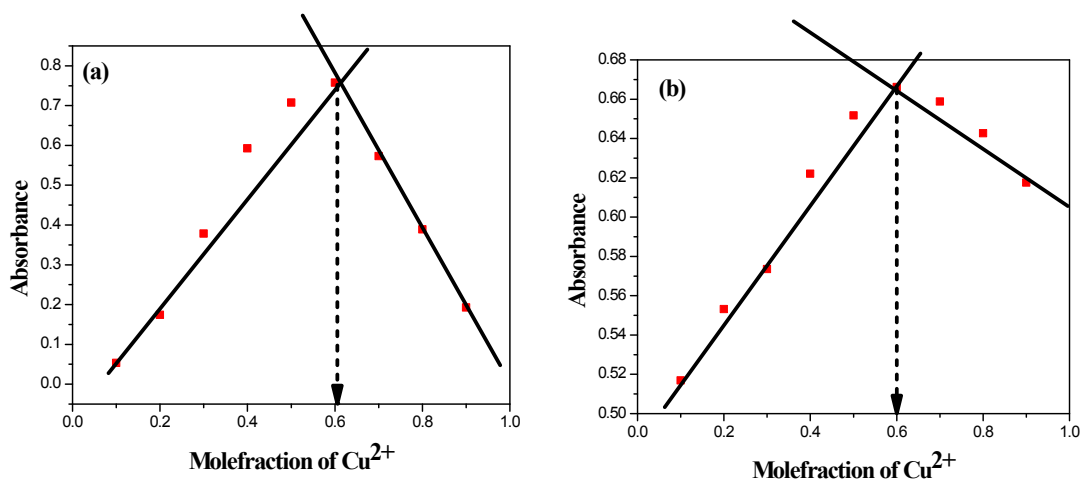

**Fig. S18** Job plots according to the method for continuous variations, the total concentration of (a) **Rh1** and (b) **Rh2** (50  $\mu\text{M}$  in  $\text{CH}_3\text{CN-H}_2\text{O}$  (v/v = 9 : 1, 5mM Tris-HCl, pH 7.4). The stoichiometries of complexes **Rh1-Cu $^{2+}$**  and **Rh2-Cu $^{2+}$**  were determined according to the method for continuous variations. The absorbance values against the molar ratios of  $[\text{Cu}^{2+}]/([\text{Cu}^{2+}] + [\text{probe}])$  show and a feature point between 0.6 abscissa in both **Figs.** (a) and (b) indicating the 1:2 stoichiometry of both complexes **Rh1-Cu $^{2+}$**  and **Rh2-Cu $^{2+}$** .

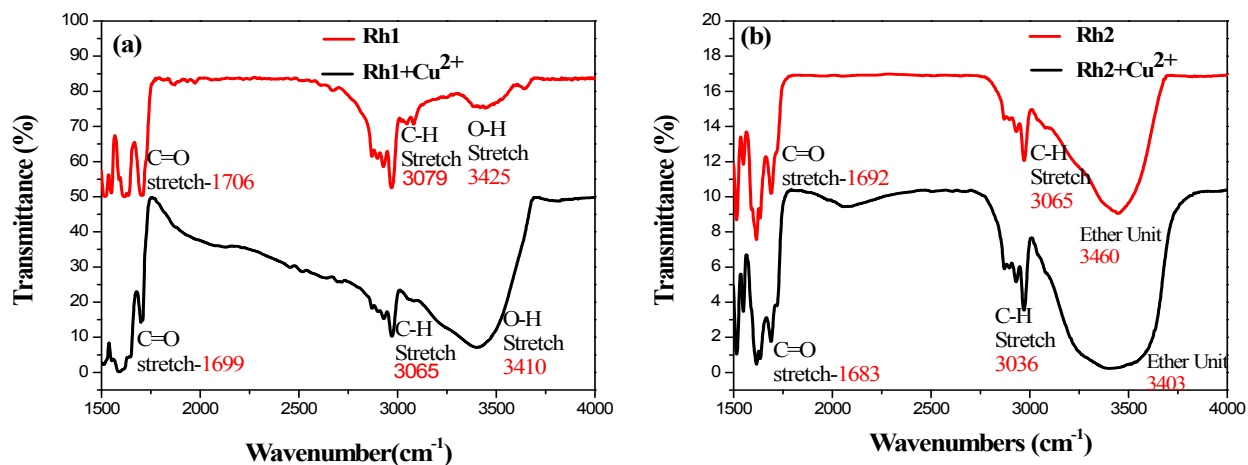

Fig. S19 FT-IR spectra of colorimetric sensor probes (a) Rh1, Rh1-Cu<sup>2+</sup> and (b) Rh2, Rh2-Cu<sup>2+</sup>.

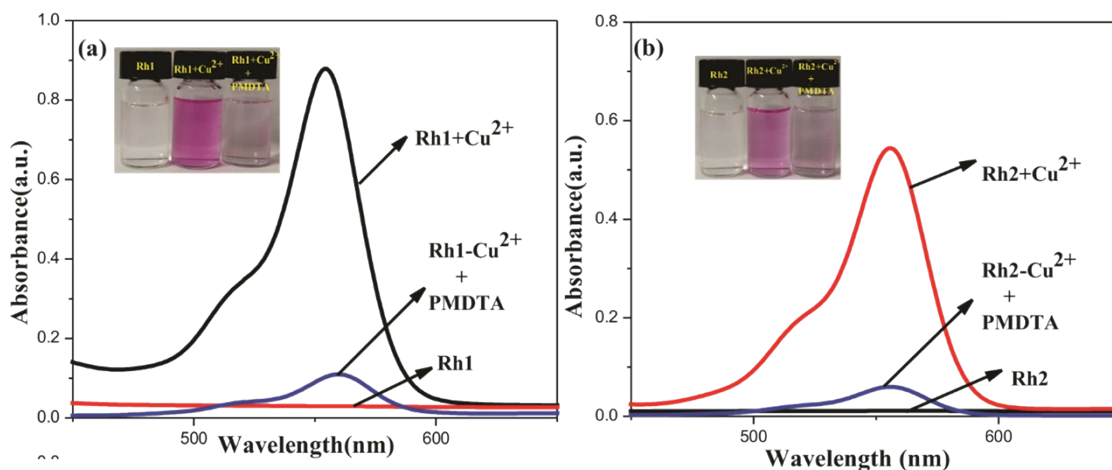

Fig. S20 Reversibility tests of sensor probes (a) Rh1-Cu<sup>2+</sup> and (b) Rh2-Cu<sup>2+</sup>.

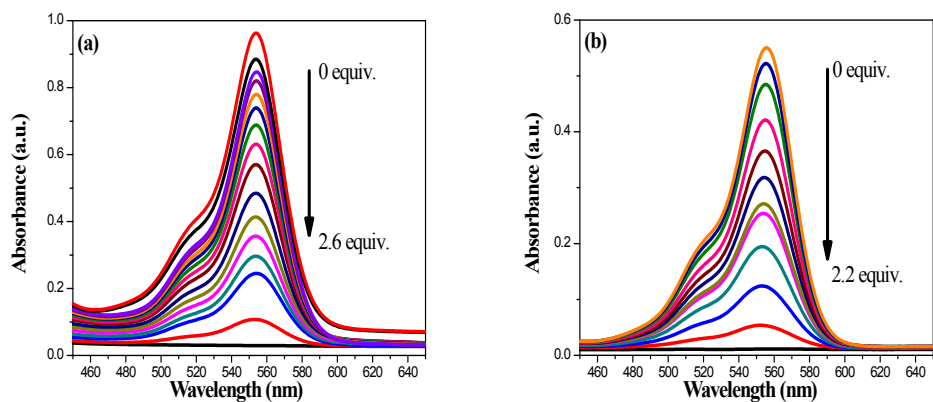

**Fig. S21** Reversibilities of (a) **Rh1-Cu<sup>2+</sup>** and (b) **Rh2-Cu<sup>2+</sup>** by the addition of PMDTA (0-2.6 equiv. and 0-2.2 equiv., respectively).

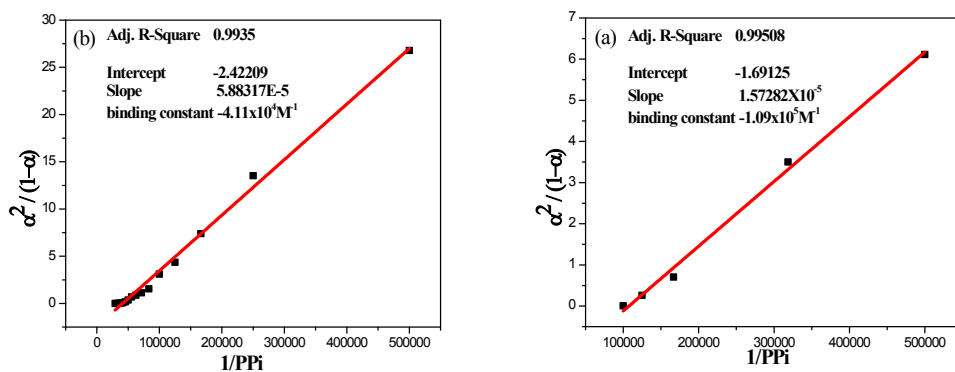

**Fig. S22** Binding constants of (a) **Rh1-Cu<sup>2+</sup>** and (b) **Rh2-Cu<sup>2+</sup>** for the titration of PPi against the ratio of colorimetric response for chemosensor (10  $\mu$ M) in CH<sub>3</sub>CN-H<sub>2</sub>O (v/v = 9 : 1, 5mM Tris-HCl, pH 7.4).

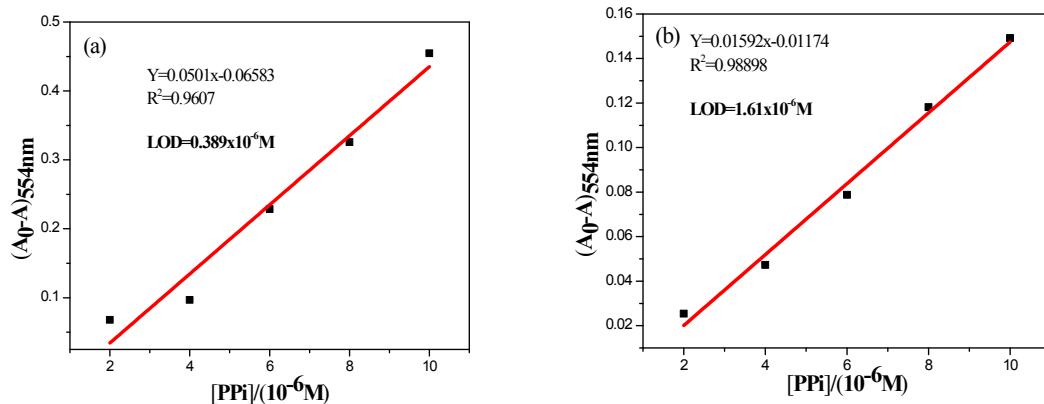

**Fig. S23** Standard deviations and linear fit equations for detection limit calculations of (a) **Rh1**-Cu<sup>2+</sup> and (b) **Rh2**-Cu<sup>2+</sup>. [Note: Detection limit calculations were based on the absorbance changes versus PPI anion concentrations.]

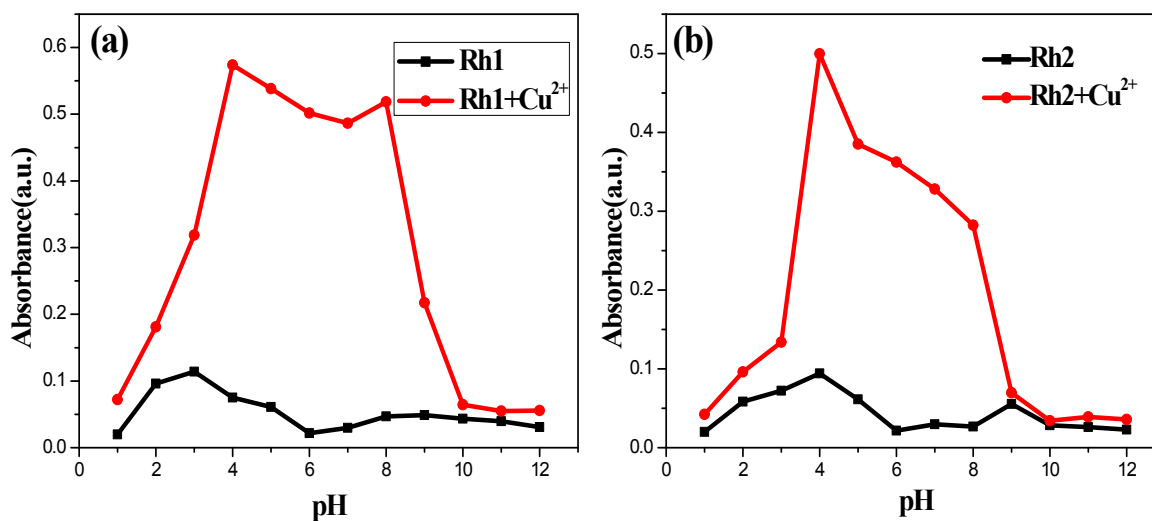

**Fig. S24** Absorption intensity of free (a) **Rh1** and (b) **Rh2** (10  $\mu$ M) in aqueous solution CH<sub>3</sub>CN-H<sub>2</sub>O (v/v = 9 : 1, 5mM Tris-HCl, pH 7.4) with and without Cu<sup>2+</sup> ion (2 equiv.) as a function of pH. [Note: Absorption intensity at 554 and 556 nm, respectively.]

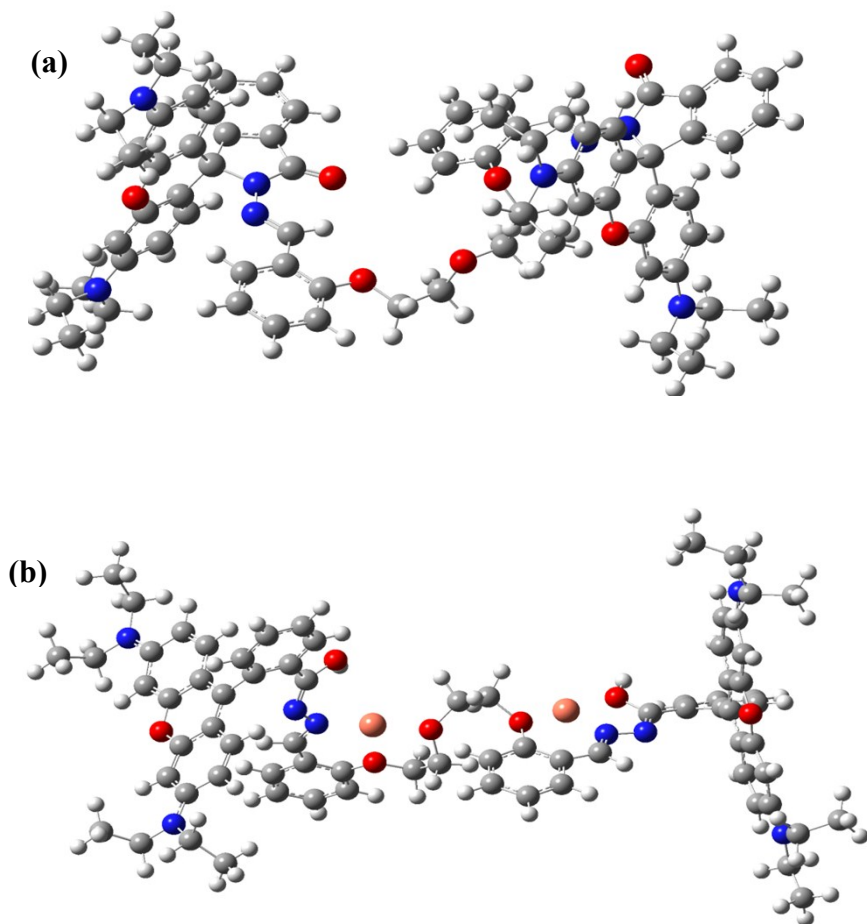

**Fig. S25** Optimized structures of (a) **Rh<sub>2</sub>** and (b) **Rh<sub>2</sub>-Cu<sup>2+</sup>** at B3LYP /LANL2DZ level.

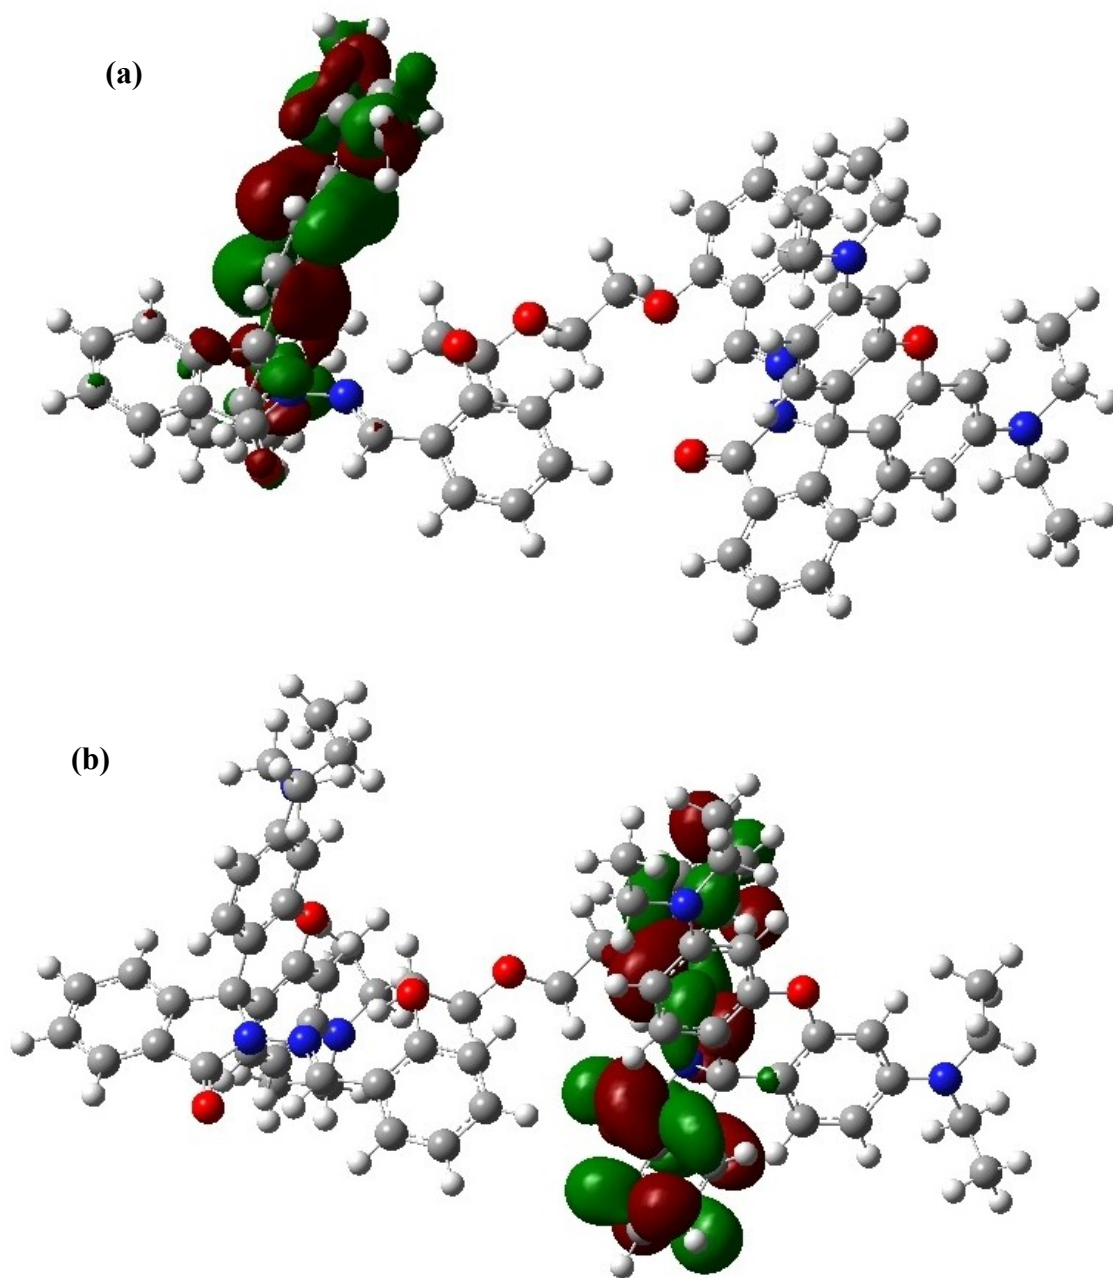

**Fig. S26** (a) HOMO and (b) LUMO structures of **Rh2** at B3LYP/LANL2DZ level in the gas phase.

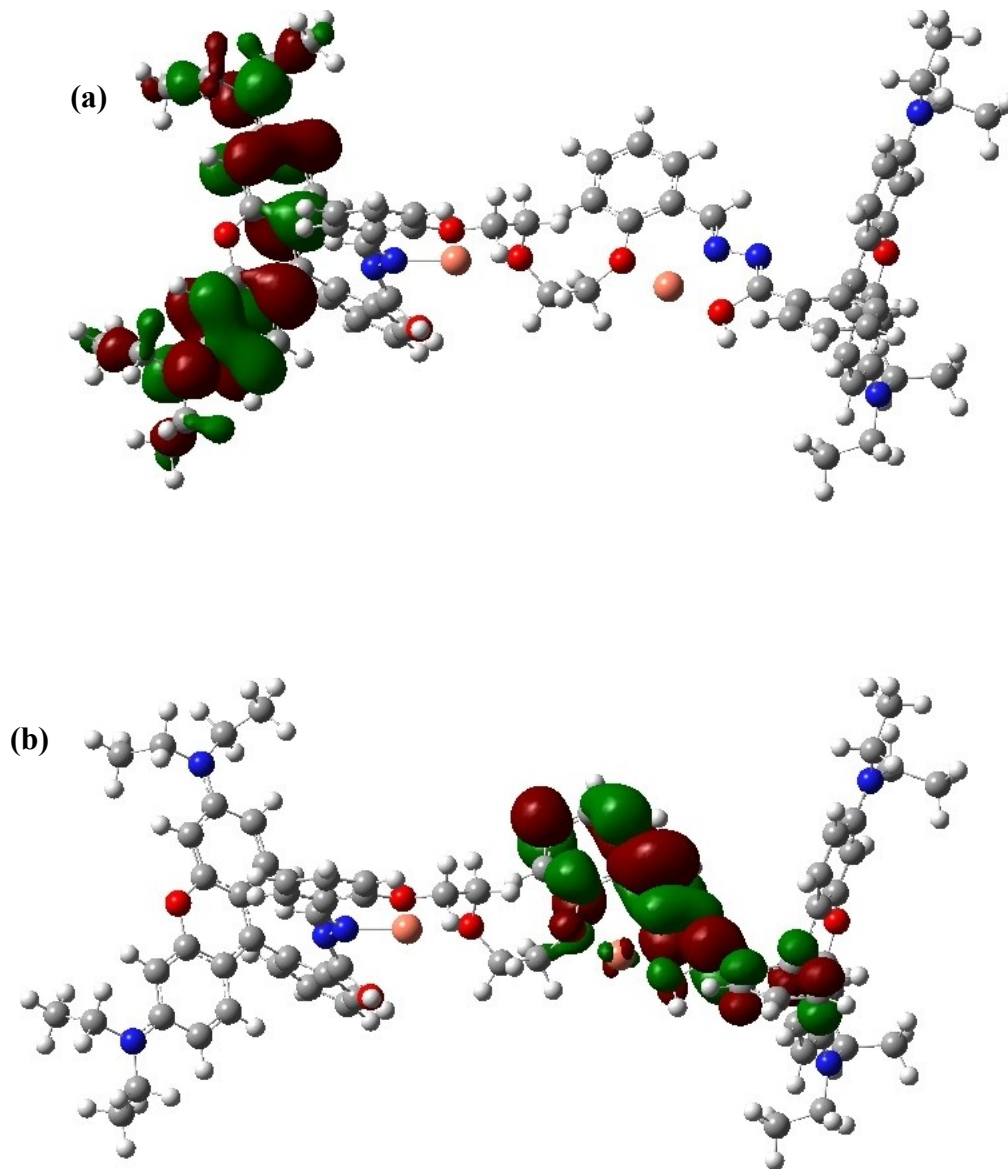

**Fig. S27** (a) HOMO and (b) LUMO structures of complex  $\text{Rh}_2\text{-Cu}^{2+}$  at B3LYP/LANL2DZ level in the gas phase.



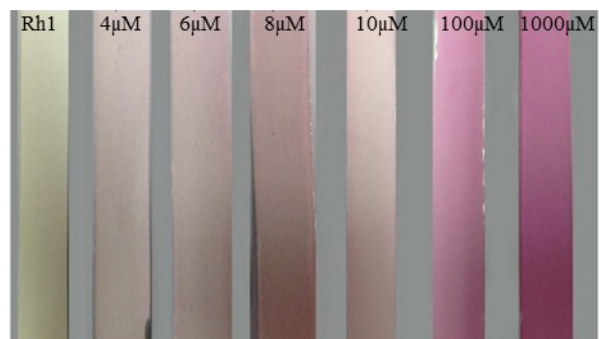

**Fig. S28** Photographs of sensor tests on **Rh1** ( $1 \times 10^{-4}$  M) strips for the detection of  $\text{Cu}^{2+}$  in aqueous solution with different concentrations. From left to right: **Rh1** (probe), 4, 6, 8, 10, 100 and 1000  $\mu\text{M}$ .

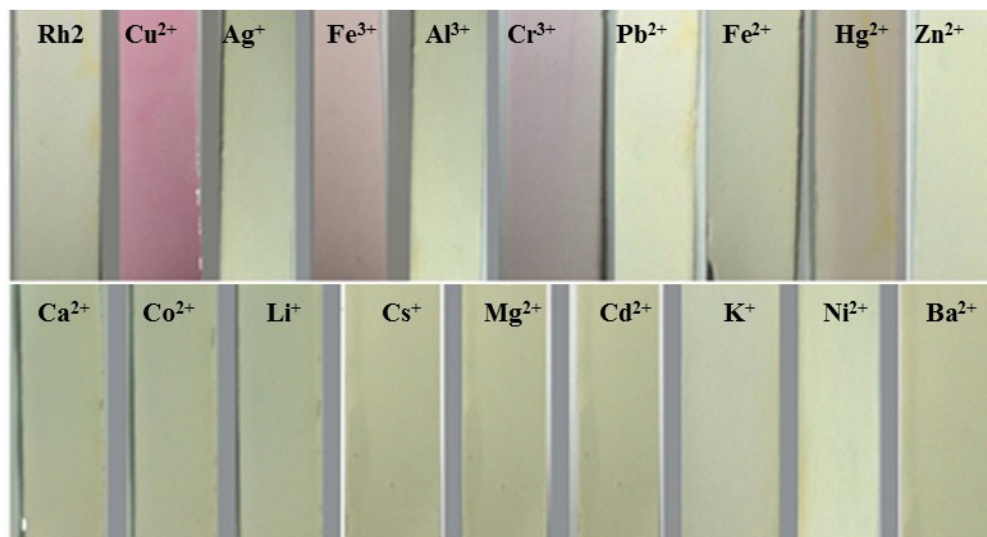

**Fig. S29** Photographs of sensor tests on **Rh2** ( $1 \times 10^{-4}$  M) strips in the presence of various metal ions ( $1 \times 10^{-3}$  M).

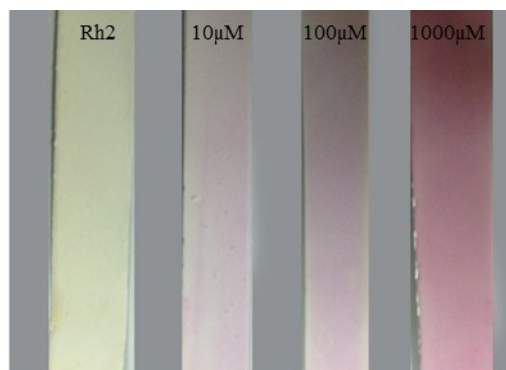

**Fig. S30** Photographs of sensor tests on **Rh2** ( $1 \times 10^{-4}$  M) strips for the detection of  $\text{Cu}^{2+}$  in aqueous solution with different concentrations. From left to right: **Rh2** (probe), 10  $\mu\text{M}$ , 100  $\mu\text{M}$  and 1000  $\mu\text{M}$ .

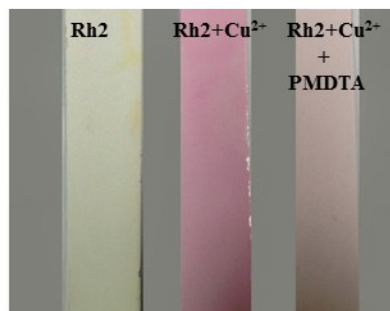

**Fig. S31** Photographs of reversibility tests on **Rh2** ( $1 \times 10^{-4}$  M) strips in the presence of **PMDTA** ( $1 \times 10^{-5}$  M). From left to right: **Rh2**, **Rh2-Cu<sup>2+</sup>** and **Rh2-Cu<sup>2+</sup>+PMDTA**.
